# Supplementary material for: The long run impact of early childhood deworming on numeracy and literacy: Evidence from Uganda
Source: PLOS journal article supplement (doi:10.1371/journal.pntd.0007085), 2019-01-31
Supplement: S1 (10.1371/journal.pntd.0007085.s001) [file journal.pntd.0007085.s001]

### **Text S1: Additional details about the Uwezo sample**

Uwezo enumeration areas were selected from the Ugandan census sampling frame using probability proportional to size, all households were then listed, and selected via systematic random sampling.

There was a partial village-level panel component from 2010–2012. While in each year, 30 villages were sampled per district, between 2010, 2011, and 2012 these were not separate random samples: 20 villages were re-sampled while 10 villages were newly sampled. There is no imbalance in the number of respondents sampled per village between treatment and control: a regression of treatment on the number of respondents per parish has a p value of 0.89 (unadjusted).

Since all students were sampled at home, and surveys took place during the school term, boarding school students were missed in all surveys.
